# Supplementary material
Source: ML conference proceedings conference paper supplement (https://proceedings.neurips.cc/paper_files/paper/2023/hash/ebb6bee50913ba7e1efeb91a1d47a002-Abstract.html)
Supplement: Supplementary file 1 [file ebb6bee50913ba7e1efeb91a1d47a002-Supplemental-Conference.pdf]

# Robust Data Pruning under Label Noise via Maximizing Re-labeling Accuracy (Supplementary Material)

## A Complete Proof of Theorem 3.4

The  $\alpha$ -expansion and  $\beta$ -separation assumptions hold for the training set  $\tilde{\mathcal{D}}$ . Then, following the re-labeling theory [45], minimizing the self-consistency loss forces the classifier into correcting the erroneous labels and improving the training accuracy, as presented in Lemma A.1.

**Lemma A.1.** (RE-LABELING BOUND). *Suppose  $\alpha$ -expansion and  $\beta$ -separation assumptions hold for the training set  $\tilde{\mathcal{D}}$ . Then, for a Re-labeling minimizer  $\theta_{\tilde{\mathcal{D}}}$  on  $\tilde{\mathcal{D}}$ , we have*

$$Err(\theta_{\tilde{\mathcal{D}}}) \leq \frac{2 \cdot Err(\theta_{\mathcal{M}})}{\alpha - 1} + \frac{2 \cdot \alpha}{\alpha - 1} \cdot \beta, \quad (8)$$

where  $Err(\cdot)$  is a training error on ground-truth labels, and  $\theta_{\mathcal{M}}$  is a model trained with the supervised loss in Eq. (1) on a minimum (or given) clean set  $\mathcal{M} \subset \mathcal{S}$ .

*Proof.* Refer to [45] for the detailed concept and proof. □

This lemma is used for proving Theorem 3.4. Since  $\alpha_{\mathcal{S}}$  indicates the average number of augmentation neighbors in  $\mathcal{S}$ , we can transform Eq. (8) using  $\alpha_{\mathcal{S}}$ ,

$$Err(\theta_{\mathcal{S}}) \leq \frac{2 \cdot Err(\theta_{\mathcal{M}})}{(1/|\mathcal{S}|) \sum_{x \in \mathcal{S}} \mathbb{1}_{[x' \in \mathcal{N}(x)]}} + \frac{2 \cdot \alpha_{\mathcal{S}}}{\alpha_{\mathcal{S}} - 1} \cdot \beta_{\mathcal{S}}. \quad (9)$$

Assume that the training error of the minimum clean set  $\mathcal{M}$  in the selected subset  $\mathcal{S}$  is proportional to the inverse of the confidence of  $x \in \mathcal{S}$ , since the performance of the standard learner is often correlated to the confidence of training examples. Then, Eq. (9) becomes

$$\begin{aligned} Err(\theta_{\mathcal{S}}) &\leq \frac{2 \cdot |\mathcal{S}| \cdot Err(\theta_{\mathcal{M}})}{\sum_{x \in \mathcal{S}} C(x) \sum_{x \in \mathcal{S}} \mathbb{1}_{[x' \in \mathcal{N}(x)]}} + \frac{2 \cdot \alpha_{\mathcal{S}}}{\alpha_{\mathcal{S}} - 1} \cdot \beta_{\mathcal{S}} \\ &\leq \frac{2 \cdot |\mathcal{S}| \cdot Err(\theta_{\mathcal{M}})}{\sum_{x \in \mathcal{S}} \mathbb{1}_{[x' \in \mathcal{N}(x)]} C(x)} + \frac{2 \cdot \alpha_{\mathcal{S}}}{\alpha_{\mathcal{S}} - 1} \cdot \beta_{\mathcal{S}}, \end{aligned} \quad (10)$$

where the last inequality holds because of Hölder's inequality with two sequence variables. Therefore,  $Err(\theta_{\mathcal{S}}) \leq \frac{2 \cdot |\mathcal{S}| \cdot Err(\theta_{\mathcal{M}})}{\sum_{x \in \tilde{\mathcal{S}}} C_{\mathcal{N}}(x; \mathcal{S})} + \frac{2 \cdot \alpha_{\mathcal{S}}}{\alpha_{\mathcal{S}} - 1} \cdot \beta_{\mathcal{S}}$ , and this concludes the proof of Theorem 3.4.

## B Details for Prune4ReL<sub>B</sub>

---

### Algorithm 2 Greedy Balanced Neighborhood Confidence (Prune4ReL<sub>B</sub>)

---

INPUT:  $\tilde{\mathcal{D}}$ : training set,  $\tilde{\mathcal{D}}_j (\subset \tilde{\mathcal{D}})$ : set of training examples with a  $j$ -th class,  $s$ : target subset size, and  $C(x)$ : confidence of  $x$  calculated from a warm-up classifier

```

1: Initialize  $\mathcal{S} \leftarrow \emptyset; \forall x \in \tilde{\mathcal{D}}, \hat{C}_{\mathcal{N}}(x) = 0$ 
2: while  $|\mathcal{S}| < s$  do
3:   for  $j = 1$  to  $c$  do
4:      $x = \operatorname{argmax}_{x \in \tilde{\mathcal{D}}_j \setminus \mathcal{S}} \sigma(\hat{C}_{\mathcal{N}}(x) + C(x)) - \sigma(\hat{C}_{\mathcal{N}}(x))$ 
5:      $\mathcal{S} = \mathcal{S} \cup \{x\}$ 
6:     for all  $v \in \tilde{\mathcal{D}}$  do
7:        $\hat{C}_{\mathcal{N}}(v) += \mathbb{1}_{[sim(x,v) \geq \tau]} \cdot sim(x,v) \cdot C(x)$ 
8:     if  $|\mathcal{S}| = s$ 
9:       return  $\mathcal{S}$ 
10: end

```

OUTPUT: Final selected subset  $\mathcal{S}$

---

Algorithm 2 describes the class-balanced version of our greedy algorithm. We first divide the entire training set into  $c$  groups according to the noisy label of each example, under the assumption that the number of correctly labeled examples is much larger than that of incorrectly labeled examples in practice [7]. Similar to Algorithm 1 in Section 3.2, we begin with an empty set  $\mathcal{S}$  and initialize the reduced neighborhood confidence  $\hat{C}_{\mathcal{N}}$  to 0 for each training example (Line 1). Then, by iterating class  $j$ , we select an example  $x$  that maximizes the marginal benefit  $\sigma(\hat{C}_{\mathcal{N}}(x) + C(x)) - \sigma(\hat{C}_{\mathcal{N}}(x))$  within the set  $\tilde{\mathcal{D}}_j(\subset \tilde{\mathcal{D}})$  and add it to the selected subset  $\mathcal{S}$  (Lines 3–5). Next, we update the reduced neighborhood confidence  $\hat{C}_{\mathcal{N}}$  of each example in the entire training set by using the confidence and the similarity score to the selected example  $x$  (Lines 6–7). We repeat this procedure until the size of the selected subset  $\mathcal{S}$  meets the target size  $s$  (Lines 8–9).

## C Complete Proof of Theorem 3.5

We complete Theorem 3.5 by proving the *monotonicity* and *submodularity* of Eq. (6) in Lemmas C.1 and C.2, under the widely proven fact that the monotonicity and submodularity of a combinatorial objective guarantee the greedy selection to get an objective value within  $(1 - 1/e)$  of the optimum [54].

**Lemma C.1.** (MONOTONICITY). *Our data pruning objective in Eq. (6), denoted as  $OBJ$ , is monotonic. Formally,*

$$\forall \mathcal{S} \subset \mathcal{S}', \quad OBJ(\mathcal{S}) \leq OBJ(\mathcal{S}'). \quad (11)$$

*Proof.*

$$\begin{aligned} OBJ(\mathcal{S}') &= \sum_{x_i \in \tilde{\mathcal{D}}} \sigma(\hat{C}_{\mathcal{N}}(x_i; \mathcal{S}')) = \sum_{x_i \in \tilde{\mathcal{D}}} \sigma\left(\sum_{x_j \in \mathcal{S}'} \mathbb{1}_{[sim(x_i, x_j) \geq \tau]} \cdot sim(x_i, x_j) \cdot C(x_j)\right) \\ &= \sum_{x_i \in \tilde{\mathcal{D}}} \sigma\left(\sum_{x_j \in \mathcal{S}} \mathbb{1}_{[sim(x_i, x_j) \geq \tau]} \cdot sim(x_i, x_j) \cdot C(x_j) + \sum_{x_j \in \mathcal{S}' \setminus \mathcal{S}} \mathbb{1}_{[sim(x_i, x_j) \geq \tau]} \cdot sim(x_i, x_j) \cdot C(x_j)\right) \\ &\geq \sum_{x_i \in \tilde{\mathcal{D}}} \sigma\left(\sum_{x_j \in \mathcal{S}} \mathbb{1}_{[sim(x_i, x_j) \geq \tau]} \cdot sim(x_i, x_j) \cdot C(x_j)\right) = \sum_{x_i \in \tilde{\mathcal{D}}} \sigma(\hat{C}_{\mathcal{N}}(x_i; \mathcal{S})) = OBJ(\mathcal{S}), \end{aligned} \quad (12)$$

where the inequality holds because of the non-decreasing property of the utility function  $\sigma$ . Therefore,  $OBJ(\mathcal{S}) \leq OBJ(\mathcal{S}')$ .  $\square$

**Lemma C.2.** (SUBMODULARITY). *Our objective in Eq. (6) is submodular. Formally,*

$$\forall \mathcal{S} \subset \mathcal{S}' \text{ and } \forall x \notin \mathcal{S}', \quad OBJ(\mathcal{S} \cup \{x\}) - OBJ(\mathcal{S}) \geq OBJ(\mathcal{S}' \cup \{x\}) - OBJ(\mathcal{S}'). \quad (13)$$

*Proof.* For notational simplicity, let  $x_i$  be  $i$ ,  $x_j$  be  $j$ , and  $\mathbb{1}_{[sim(x_i, x_j) \geq \tau]} \cdot sim(x_i, x_j) \cdot C(x_j)$  be  $C_{ij}$ . Then, Eq. (13) can be represented as

$$\sum_{i \in \tilde{\mathcal{D}}} \sigma\left(\sum_{j \in \mathcal{S}} C_{ij} + C_{ix}\right) - \sum_{i \in \tilde{\mathcal{D}}} \sigma\left(\sum_{j \in \mathcal{S}} C_{ij}\right) \geq \sum_{i \in \tilde{\mathcal{D}}} \sigma\left(\sum_{j \in \mathcal{S}'} C_{ij} + C_{ix}\right) - \sum_{i \in \tilde{\mathcal{D}}} \sigma\left(\sum_{j \in \mathcal{S}'} C_{ij}\right). \quad (14)$$

Proving Eq. (14) is equivalent to proving the decomposed inequality for each example  $x_i \in \tilde{\mathcal{D}}$ ,

$$\begin{aligned} \sigma\left(\sum_{j \in \mathcal{S}} C_{ij} + C_{ix}\right) - \sigma\left(\sum_{j \in \mathcal{S}} C_{ij}\right) &\geq \sigma\left(\sum_{j \in \mathcal{S}'} C_{ij} + C_{ix}\right) - \sigma\left(\sum_{j \in \mathcal{S}'} C_{ij}\right) \\ &= \sigma\left(\sum_{j \in \mathcal{S}} C_{ij} + \sum_{j \in \mathcal{S}' \setminus \mathcal{S}} C_{ij} + C_{ix}\right) - \sigma\left(\sum_{j \in \mathcal{S}} C_{ij} + \sum_{j \in \mathcal{S}' \setminus \mathcal{S}} C_{ij}\right). \end{aligned} \quad (15)$$

Since  $\mathcal{S}$ ,  $\mathcal{S}' \setminus \mathcal{S}$ , and  $\{x\}$  do not intersect each other, we can further simplify Eq. (15) with independent scala variables such that

$$\sigma(a + \epsilon) - \sigma(a) \geq \sigma(a + b + \epsilon) - \sigma(a + b), \quad (16)$$

where  $a = \sum_{j \in \mathcal{S}} C_{ij}$ ,  $b = \sum_{j \in \mathcal{S}' \setminus \mathcal{S}} C_{ij}$ , and  $\epsilon = C_{ix}$ .

Since the utility function  $\sigma$  is *concave*, by the definition of concavity,

$$\frac{\sigma(a + \epsilon) - \sigma(a)}{(a + \epsilon - a)} \geq \frac{\sigma(a + b + \epsilon) - \sigma(a + b)}{(a + b + \epsilon - (a + b))}. \quad (17)$$

The denominators of both sides of the inequality become  $\epsilon$ , and Eq. (17) can be transformed to Eq. (16). Therefore, Eq. (16) should hold, and  $OBJ(\mathcal{S} \cup \{x\}) - OBJ(\mathcal{S}) \geq OBJ(\mathcal{S}' \cup \{x\}) - OBJ(\mathcal{S}')$ .  $\square$

Table 7: Summary of the hyperparameters for training SOP+ and DivideMix on the CIFAR-10N/100N, Webvision, and Clothing-1M datasets.

| Hyperparameters        |                    | CIFAR-10N          | CIFAR-100N         | WebVision          | Clothing-1M            |
|------------------------|--------------------|--------------------|--------------------|--------------------|------------------------|
| Training Configuration | architecture       | PreAct PresNet18   | PreAct PresNet18   | InceptionResNetV2  | ResNet-50 (pretrained) |
|                        | warm-up epoch      | 10                 | 30                 | 10                 | 0                      |
|                        | training epoch     | 300                | 300                | 100                | 10                     |
|                        | batch size         | 128                | 128                | 32                 | 32                     |
|                        | learning rate (lr) | 0.02               | 0.02               | 0.02               | 0.002                  |
|                        | lr scheduler       | Cosine Annealing   | Cosine Annealing   | MultiStep-50th     | MultiStep-5th          |
|                        | weight decay       | $5 \times 10^{-4}$ | $5 \times 10^{-4}$ | $5 \times 10^{-4}$ | 0.001                  |
| DivideMix              | $\lambda_U$        | 1                  | 1                  |                    | 0.1                    |
|                        | $\kappa$           | 0.5                | 0.5                |                    | 0.5                    |
|                        | $T$                | 0.5                | 0.5                | -                  | 0.5                    |
|                        | $\gamma$           | 4                  | 4                  |                    | 0.5                    |
|                        | $M$                | 2                  | 2                  |                    | 2                      |
| SOP+                   | $\lambda_C$        | 0.9                | 0.9                | 0.1                |                        |
|                        | $\lambda_B$        | 0.1                | 0.1                | 0                  |                        |
|                        | lr for $u$         | 10                 | 1                  | 0.1                | -                      |
|                        | lr for $v$         | 100                | 100                | 1                  |                        |

By Lemmas C.1 and C.2, the monotonicity and submodularity of Eq. (6) hold. Therefore, Eq. (7) naturally holds, and this concludes the proof of Theorem 3.5.

## D Details for Constructing ImageNet-N

Since ImageNet-1K is a clean dataset with no known real label noise, we inject the synthetic label noise to construct ImageNet-N. Specifically, we inject *asymmetric* label noise to mimic real-world label noise following the prior noisy label literature [10]. When a target noise ratio of ImageNet-N is  $r\%$ , we randomly select  $r\%$  of the training examples for each class  $c$  in ImageNet-1K and then flip their label into class  $c + 1$ , *i.e.*, class 0 into class 1, class 1 into class 2, and so on. This flipping is reasonable because consecutive classes likely belong to the same high-level category. For the selected examples with the last class 1000, we flip their label into class 0.

## E Implementation Details

Table 7 summarizes the overall training configurations and hyperparameters used to train the two Re-labeling models, DivideMix and SOP+. The hyperparameters for DivideMix and SOP+ are favorably configured following the original papers. DivideMix [13] has multiple hyperparameters:  $\lambda_U$  for weighting the self-consistency loss,  $\kappa$  for selecting confidence examples,  $T$  for sharpening prediction probabilities,  $\gamma$  for controlling the Beta distribution, and  $M$  for the number of augmentations. For both CIFAR-10N and CIFAR-100N, we use  $\lambda_U = 1$ ,  $\kappa = 0.5$ ,  $T = 0.5$ ,  $\gamma = 4$ , and  $M = 2$ . For Clothing-1M, we use  $\lambda_U = 0.1$ ,  $\kappa = 0.5$ ,  $T = 0.5$ ,  $\gamma = 0.5$ , and  $M = 2$ . SOP+ [33] also involves several hyperparameters:  $\lambda_C$  for weighting the self-consistency loss,  $\lambda_B$  for weighting the class-balance, and learning rates for training its additional variables  $u$  and  $v$ . For CIFAR-10N, we use  $\lambda_C = 0.9$  and  $\lambda_B = 0.1$ , and set the learning rates of  $u$  and  $v$  to 10 and 100, respectively. For CIFAR-100N, we use  $\lambda_C = 0.9$  and  $\lambda_B = 0.1$ , and set the learning rates of  $u$  and  $v$  to 1 and 100, respectively. For WebVision, we use  $\lambda_C = 0.1$  and  $\lambda_B = 0$ , and set the learning rates of  $u$  and  $v$  to 0.1 and 1, respectively.

Besides, the hyperparameters for all data pruning algorithms are also favorably configured following the original papers. For Forgetting [14], we calculate the forgetting event of each example throughout the warm-up training epochs in each dataset. For GraNd [15], we train ten different warm-up classifiers and calculate the per-sample average of the norms of the gradient vectors obtained from the ten classifiers.

## F Limitation and Potential Negative Societal Impact

**Limitation.** Although Prune4ReL has demonstrated consistent effectiveness in the classification task with real and synthetic label noises, we have not validated its applicability on datasets with open-set noise or out-of-distribution examples [55, 56]. Also, we have not validated its applicability to state-of-the-art deep learning models, such as large language models [3] and vision-language models [4]. This verification would be valuable because the need for data pruning in the face of annotation noise is consistently high across a wide range of real-world tasks. In addition, Prune4ReL has not been validated in other realistic applications of data pruning, such as continual learning [57] and neural architecture search [58]. In these scenarios, selecting informative examples is very important, and we leave them for future research.

**Potential Negative Societal Impact.** We consider how to preserve the model performance while reducing the computation costs, which can even reduce substantial energy consumption, *e.g.*, CO<sub>2</sub> emission. Hence, it is hard to apply to any negative applications, and there is no discussion of potential negative social impact.
